# Supplementary material for: The length-of-stay associated with adequacy of empirical antimicrobial therapy – systematic reviews with meta-analysis
Source: Research Square preprint supplement (doi:10.21203/rs.3.rs-5626700/v1), 2024-12-16
Supplement: Supplementary file 1 [file 3303085f54d228915287d22f.docx]

("antibiotic"[Title/Abstract] OR "antimicrobial"[Title/Abstract] OR "antibiotic therapy"[Title/Abstract] OR "antibacterial"[Title/Abstract]) AND ("correct"[Title/Abstract] OR "adequate"[Title/Abstract] OR "adequate"[Title/Abstract] OR "inadequate"[Title/Abstract] OR "incorrect"[Title/Abstract] OR "wrong"[Title/Abstract]) AND ("outcome"[Title/Abstract] OR "death"[Title/Abstract] OR "survival"[Title/Abstract] OR "discharge"[Title/Abstract]) AND (("anti bacterial agents"[Pharmacological Action] OR "anti bacterial agents"[MeSH Terms] OR ("anti bacterial"[All Fields] AND "agents"[All Fields]) OR "anti bacterial agents"[All Fields] OR "antibiotic"[All Fields] OR "antibiotics"[All Fields] OR "antibiotic s"[All Fields] OR "antibiotical"[All Fields] OR ("anti infective agents"[Pharmacological Action] OR "anti infective agents"[MeSH Terms] OR ("anti infective"[All Fields] AND "agents"[All Fields]) OR "anti infective agents"[All Fields] OR "antimicrobial"[All Fields] OR "antimicrobials"[All Fields] OR "antimicrobially"[All Fields]) OR (("anti bacterial agents"[Pharmacological Action] OR "anti bacterial agents"[MeSH Terms] OR ("anti bacterial"[All Fields] AND "agents"[All Fields]) OR "anti bacterial agents"[All Fields] OR "antibiotic"[All Fields] OR "antibiotics"[All Fields] OR "antibiotic s"[All Fields] OR "antibiotical"[All Fields]) AND ("therapeutics"[MeSH Terms] OR "therapeutics"[All Fields] OR "therapies"[All Fields] OR "therapy"[MeSH Subheading] OR "therapy"[All Fields] OR "therapy s"[All Fields] OR "therapys"[All Fields])) OR ("anti bacterial agents"[Pharmacological Action] OR "anti bacterial agents"[MeSH Terms] OR ("anti bacterial"[All Fields] AND "agents"[All Fields]) OR "anti bacterial agents"[All Fields] OR "antibacterial"[All Fields] OR "antibacterials"[All Fields] OR "antibacterially"[All Fields])) AND ("correct"[All Fields] OR "correctability"[All Fields] OR "correctable"[All Fields] OR "corrected"[All Fields] OR "correctible"[All Fields] OR "correcting"[All Fields] OR "correction"[All Fields] OR "corrections"[All Fields] OR "corrective"[All Fields] OR "correctives"[All Fields] OR "correctness"[All Fields] OR "corrects"[All Fields] OR ("adequate"[All Fields] OR "adequately"[All Fields]) OR ("adequate"[All Fields] OR "adequately"[All Fields]) OR ("inadequate"[All Fields] OR "inadequately"[All Fields] OR "inadequates"[All Fields]) OR ("incorrect"[All Fields] OR "incorrectness"[All Fields]) OR ("wrong"[All Fields] OR "wronged"[All Fields] OR "wrongful"[All Fields] OR "wrongfulness"[All Fields] OR "wronging"[All Fields] OR "wrongness"[All Fields] OR "wrongs"[All Fields])) AND ("outcome"[All Fields] OR "outcomes"[All Fields] OR ("death"[MeSH Terms] OR "death"[All Fields] OR "deaths"[All Fields]) OR ("mortality"[MeSH Subheading] OR "mortality"[All Fields] OR "survival"[All Fields] OR "survival"[MeSH Terms] OR "survivability"[All Fields] OR "survivable"[All Fields] OR "survivals"[All Fields] OR "survive"[All Fields] OR "survived"[All Fields] OR "survives"[All Fields] OR "surviving"[All Fields]) OR ("discharges"[All Fields] OR "discharging"[All Fields] OR "patient discharge"[MeSH Terms] OR ("patient"[All Fields] AND "discharge"[All Fields]) OR "patient discharge"[All Fields] OR "discharge"[All Fields] OR "discharged"[All Fields])))

**Box 1**. Search terms used as search strategy
