# Supplementary material for: The length-of-stay associated with adequacy of empirical antimicrobial therapy – systematic reviews with meta-analysis
Source: Research Square preprint supplement (doi:10.21203/rs.3.rs-5626700/v1), 2024-12-16
Supplement: Supplementary file 3 [file 6875809f59aa4d5fbc1cf609.docx]

| Article | Newcastle-Ottawa Scale Score | Strong Points | Limitations |
| --- | --- | --- |
| Clinical Impact of Rapid Species Identification From Positive Blood Cultures With Same-day Phenotypic Antimicrobial Susceptibility Testing on the Management and Outcome of Bloodstream Infections | 9 | | - - Quasi-experimental study with a control group, allowing evaluation of the impact of the new technology (ADX).   - Control of important variables, such as implementation of antimicrobial stewardship program (ASP).   - Evaluation of relevant clinical outcomes. | - - Absence of randomization of patients in different groups.   - Exclusion of patients with specific criteria.   - Lack of assessment. |
| European Practices of Infections with Staphylococcus aureus (SEPIA) Study Group. Adequacy of antimicrobial treatment and outcome of Staphylococcus aureus bacteremia in 9 Western European countries |NOS Score not applicable | | - - Multicenter study involving 9 European countries, increasing sample representativeness.   - Validation of collected data quality.   - Multivariate analysis controlling for potential confounding factors. | - - Selection of participating hospitals does not clarify criteria used.   - Lack of information about outcome (mortality) ascertainment and whether it was present at study start.   - High dropout rate of participating hospitals during follow-up.   - Follow-up limited to hospitalization period. |
| Antimicrobial agent prescription: a prospective cohort study in patients with sepsis and septic shock | 8 stars| | - - Prospective study with rigorous patient identification based on clinical histories.   - Antibiotic prescription evaluation conducted independently by infectious disease specialists.   - No loss to follow-up. Adjustment of analyses for known prognostic factors in sepsis. | - - Antibiotic prescription evaluation process different for patients with positive and negative cultures.   - Initially estimated sample size may have been insufficient to detect differences in outcomes.   - No control group of patients without severe sepsis or septic shock. |
| Surgical Site Infections: Does Inadequate Antibiotic Therapy Affect Patient Outcomes? | 9 stars | | - Retrospective cohort design allowing evaluation of inadequate antibiotic therapy impact on outcomes of interest. - Control for important confounding factors such as disease severity (APACHE II) and infection site. Evaluation of relevant outcomes such as length of hospitalization and costs. | - Relatively small sample from a single center limiting result generalization. - Possible selection bias as only patients with positive cultures included. - Lack of assessment of other factors influencing outcomes such as surgical infection control adequacy and nursing care. |
| Epidemiology and Economic Outcomes Associated with Timely versus Delayed Receipt of Appropriate Antibiotic Therapy among US Patients Hospitalized for Native Septic Arthritis | 8 | | - Study utilized large database (Premier Healthcare Database) with detailed information on hospitalized patients, enhancing sample representativeness. - Authors adjusted for relevant confounding factors using inverse probability treatment weighting (IPTW) technique. | - Definition of timely antimicrobial therapy (within 2 days of admission) may be restrictive. Important clinical outcomes such as mortality and complications not assessed due to database limitations. - Unable to evaluate initial empiric treatment adequacy. |
| Gram-negative bacteraemia in non-ICU patients: factors associated with inadequate antibiotic therapy and impact on outcomes | 9 stars| | - Prospective study reducing memory and selection biases. - Detailed collection of clinical and microbiological data including antibiotic therapy. Separate analysis of empiric and definitive therapy. - Assessment of treatment adequacy at different timepoints. Control of relevant confounding factors. | - Single-center study limiting result generalization. Infection-attributable mortality not assessed. - Sample size possibly insufficient. - Definitive antibiotic therapy adequacy not evaluated in all patients. |
| Impact of an antimicrobial stewardship programme on patient safety in Singapore General Hospital | 9 stars | | - Retrospective cohort observational study design allowing analysis of ASP intervention impact on patient safety. - Control of relevant confounding variables. - Evaluation of important clinical outcomes like length of stay, readmission and mortality. - Two-year follow-up period. | - Single hospital center limiting result generalization. - Possible selection bias as physicians may have rejected ASP interventions in more severe patients. - Outcomes evaluated through medical records with possible underreporting or recording errors. |
| Inadequate Antibiotic Therapy Results in Higher Recurrence Rate after Drainage of Complicated Peri-Rectal Abscess | 8 points | | - Retrospective cohort design analyzing data from prospective database enhancing methodological quality. - Evaluation of antibiotic therapy adequacy based on microbiological results. - Multivariate analysis controlling possible confounding factors. Inclusion of relevant demographic and clinical data. | - Single-center study limiting result generalization. Relatively small patient number especially regarding recurrence outcome. - Absence of standardized long-term follow-up protocol potentially leading to recurrence underreporting. |
| Inappropriate empiric antifungal therapy for candidemia in the ICU and hospital resource utilization: a retrospective cohort study | 9 points | | - Retrospective cohort design allowing evaluation of inappropriate therapy impact on hospital resource utilization. - Adjustment for potential confounding factors. Evaluation of relevant clinical outcomes like hospital mortality and length of stay. - Economic analysis considering hospital costs. | - Single-center study limiting result generalization. Possible selection bias as unexposed cohort not clearly defined. - Absence of disease severity information at study start. - Total hospitalization cost data without possibility to isolate candidemia-attributable costs. |
| Mortality after Delay of Adequate Empiric Antimicrobial Treatment of Bloodstream Infection | 9 stars | | - Use of propensity score matching to control confounding factors. - Adequate 14-day follow-up for primary outcome evaluation. - Low proportion of missing data. | - Exposure definition (inadequate empiric treatment) based only on medical records without additional confirmation. - No evaluation of mortality prior to study start. - Outcome assessment limited to mortality without considering other relevant outcomes. |
| Mortality and morbidity attributable to inadequate empirical antimicrobial therapy in patients admitted to the ICU with sepsis | 9 stars | | - Matched retrospective cohort study design controlling important confounding factors. - Clear definition of exposure and outcomes. - Group matching by relevant clinical characteristics. - Follow-up until hospital discharge avoiding loss to follow-up. - Additional analysis excluding nosocomial infection patients. | - Relatively small sample size though inherent to observational studies. - Despite matching, not all potential confounding factors could be controlled. - No sensitivity analysis evaluating impact of different inadequate antimicrobial therapy definitions. - No economic impact evaluation. |
| Right dose, right now: bedside, real-time, data-driven, and personalised antibiotic dosing in critically ill patients | 9 stars | | - Randomized controlled study with random patient allocation. - Control of relevant potential confounding factors. - Use of electronic medical record data and rigorous patient monitoring. - Evaluation of relevant clinical outcomes including mortality and adverse events. | - Early study interruption due to COVID-19 pandemic resulting in reduced sample size. - No healthcare professional blinding regarding patient allocation. - No evaluation of relationship between clinical and pharmacokinetic outcomes. - Potential selection bias. |
| Antimicrobial agent prescription: a prospective cohort study in patients with sepsis and septic shock | 7 stars | | - The prospective design is a significant strength, minimizing recall and selection bias. - The relatively large sample size (705 patients) provided reasonable statistical power. - The study employed logistic regression analyses to account for confounding factors, enhancing internal validity. - The inclusion of three different hospitals reduced the risk of bias associated with single-center studies. | - The definition of adequate prescription was complex and depended on subjective factors, potentially introducing bias. - Inter-rater reliability was not 100%, indicating some subjectivity in the assessment of prescription adequacy. - A significant exclusion rate suggests the possibility of selection bias and a potential impact on the generalizability of the results. - The lack of blinding among researchers collecting the data increases the risk of assessment bias. |
